# Supplementary material for: Recent transformations of vinylidene cyclopropanes (VDCPs)
Source: Royal Society of Chemistry journal article supplement (doi:10.1039/d4cc06137c), 2025-01-01
Supplement: d4cc06137c1.pdf [file d4cc06137c1.pdf]

## Supporting Information

### Recent Transformations of Vinylidenecyclopropanes (VDCPs)

Sheng-Hao Jiang,<sup>a</sup> Yin Wei,<sup>\*b</sup> Min Shi<sup>\*a,b</sup>

<sup>a</sup>Key Laboratory for Advanced Materials and Institute of Fine Chemicals, Key Laboratory for Advanced Materials and Feringa Nobel Prize Scientist Joint Research Center, School of Chemistry & Molecular Engineering, East China University of Science and Technology, Meilong Road No.130, Shanghai, 200237, China

<sup>b</sup>State Key Laboratory of Organometallic Chemistry, Center for Excellence in Molecular Synthesis, University of Chinese Academy of Sciences, Shanghai Institute of Organic Chemistry, Chinese Academy of Sciences, 345 Lingling Road, Shanghai 200032, China

## Preparation of the starting materials of vinylidenecyclopropanes (VDCPs)

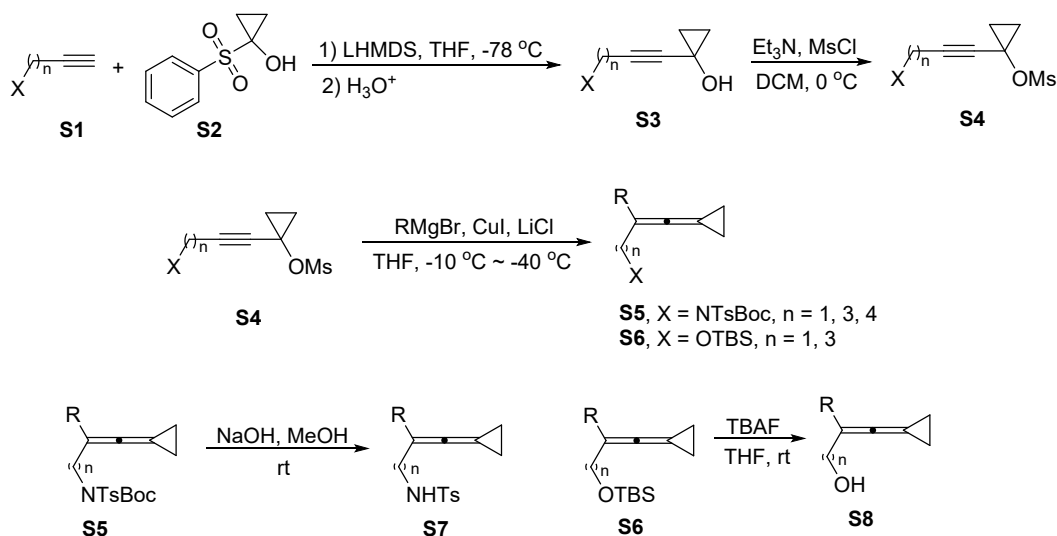

Typical procedure:

The procedure of preparing compounds **S5** and **S6** were slightly modified by the previous literature.<sup>1</sup> To the solution of compounds **S1** (20 mmol) in THF (30 mL) was added LHMDS (22 mmol, 1.0 M in THF) within 20 min at  $-78\text{ }^\circ\text{C}$  under argon. The resulting solution was allowed to stir at  $-78\text{ }^\circ\text{C}$  for 0.5 h before a solution of **S2** (10 mmol) in THF (10 mL) was added into the above mixture. Consequently, the reaction mixture was allowed to warm up to room temperature and was stirred for 8.0 h. Then, saturated  $NH_4Cl$  solution was added to quench the reaction. Extracted with ethyl ether, dried over anhydrous  $Na_2SO_4$ , filtered, the organic phase was purified by a flash column chromatography on silica gel to give the corresponding products **S3** (PE/EA: 4:1~2:1).

Under argon atmosphere, compound **S3** (4.0 mmol) was dissolved in DCM (10.0 mL) at  $0\text{ }^\circ\text{C}$ ,  $Et_3N$  (8.0 mmol) and  $MsCl$  (6.0 mmol) was added. After stirring for 1.0 h, the reaction was quenched with  $H_2O$  (10.0 mL), extracted with DCM (10 mL x 3), and dried over anhydrous  $Na_2SO_4$ . The solvent was removed under reduced pressure and the residue was purified by a flash column chromatography ( $SiO_2$ ) to give the corresponding product **S4** (PE/EA: 4:1).

Under argon atmosphere,  $CuI$  (2.2 mmol) and  $LiCl$  (2.2 mmol) in a three-necked bottle was dried upon heating. Then THF (10 mL) was added. at  $-10\text{ }^\circ\text{C}$ ,  $RMgBr$  (1.0 mol/L in THF, 2.0 mmol, 2.0 mL) was added to the reaction mixture. 10 minutes later, the flask was moved into a  $-40\text{ }^\circ\text{C}$  bath and stirred for a while before a solution of **S4** (1.0 mmol) in THF (10 mL) was added dropwise into the above flask. After stirring at  $-40\text{ }^\circ\text{C}$  for 8.0 h, the reaction was quenched with saturated  $NH_4Cl$  solution, extracted with EA (10 mL x 3), and dried over anhydrous  $Na_2SO_4$ . The solvent was removed

under reduced pressure and the residue was purified by a flash column chromatography (SiO<sub>2</sub>) to give the corresponding product **S5** and **S6** (PE/EA: 10:1).

To the solution of **S5** (1.5 mmol) in MeOH (10 mL) was added NaOH (15 mmol). The resulting solution was stirred at room temperature for 8.0 h. The solvent was removed under reduced pressure and the residue was purified by a flash column chromatography (SiO<sub>2</sub>) to give the corresponding product **S7** (PE/EA: 4:1).

In a flame dried 20 mL vial, compound **S6** (2.0 mmol, 1.0 eq.) was combined with anhydrous THF (10 mL) under argon, and then TBAF (1.0 M solution in THF, 3.0 mL, 3.0 mmol, 1.5 eq.) was added all at once. The solution was left to stir at 0 °C for 1.0 h, and then was concentrated under reduced pressure and purified directly by a flash chromatography (SiO<sub>2</sub>) to give product **S8** (PE/EA: 2:1).

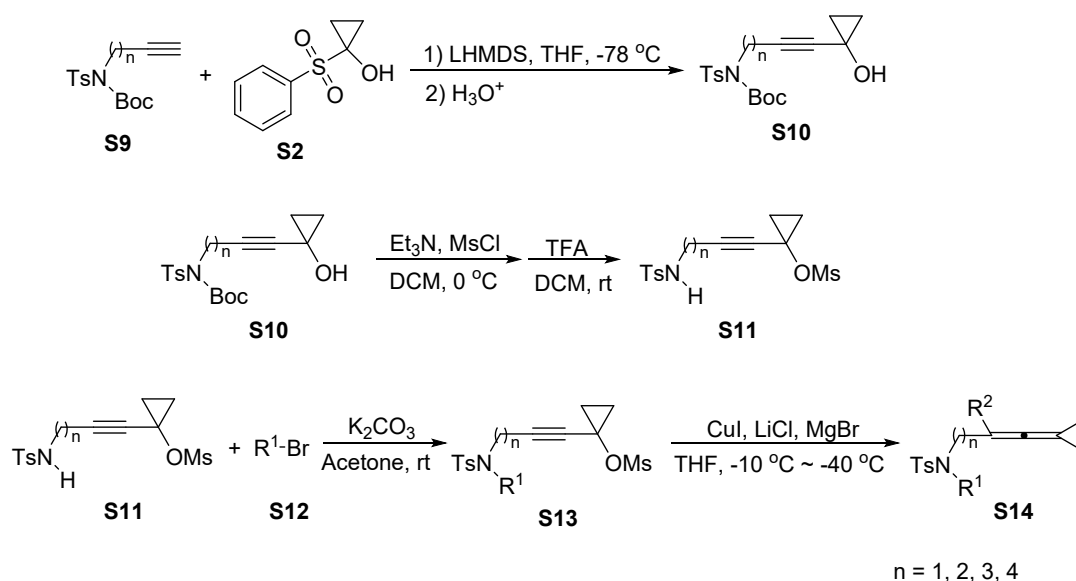

Typical procedure:

Compound **S10** was prepared in the same way as that of compound **S4**. Under argon atmosphere, compound **S10** (4.0 mmol) was dissolved in DCM (10.0 mL) at  $0\text{ }^{\circ}\text{C}$ ,  $\text{Et}_3\text{N}$  (8.0 mmol) and  $\text{MsCl}$  (6.0 mmol) was added. After stirring for 1.0 h, the reaction was quenched with  $\text{H}_2\text{O}$  (10.0 mL), extracted with DCM (10 mL x 3), and dried over anhydrous  $\text{Na}_2\text{SO}_4$ . The solvent was removed under reduced pressure and the residue was transferred into a 50 mL flask with 10 mL DCM. Then, trifluoroacetic acid (TFA, 40 mmol) was added dropwise. After stirring for 12 h, the reaction was quenched with saturated  $\text{NaCO}_3$  solution, extracted with DCM (10 mL x 3), and dried over anhydrous  $\text{Na}_2\text{SO}_4$ . The solvent was removed under reduced pressure and the residue was purified by a flash column chromatography ( $\text{SiO}_2$ ) to give the corresponding product **S11** (PE/EA: 4:1~1:1).

To the solution of **S11** (1.5 mmol) and  $\text{K}_2\text{CO}_3$  (1.8 mmol) in acetone (10 mL) was added **S12** ( $\text{R}^1\text{-Br}$ , 1.8 mmol). The resulting solution was allowed to stir at  $70\text{ }^{\circ}\text{C}$  for 8.0 h. Then, the reaction mixture was cooled to room temperature and the mixture was filtered through a celite. The filtrate was concentrated under reduced pressure and the residue was purified by a flash column chromatography ( $\text{SiO}_2$ ) to give the corresponding product **S13** (PE/EA: 4:1~2:1).

Under argon atmosphere,  $\text{CuI}$  (2.2 mmol) and  $\text{LiCl}$  (2.2 mmol) in a three-necked bottle was dried upon heating. Then THF (10 mL) was added. At  $-15\text{ }^{\circ}\text{C}$ ,  $\text{R}^2\text{MgBr}$  (1.0 M in THF, 2.0 mmol, 2.0 mL) was added to the reaction mixture. 10 minutes later, the flask was moved into a  $-40\text{ }^{\circ}\text{C}$  bath and stirred for a while before a solution of **S13** (1.0 mmol) in THF (10 mL) was

added dropwise into the above flask. After stirring at -40 °C for 8.0 h, the reaction was quenched with saturated  $\text{NH}_4\text{Cl}$  solution, extracted with EA (10 mL x 3), and dried over anhydrous  $\text{Na}_2\text{SO}_4$ . The solvent was removed under reduced pressure and the residue was purified by a flash column chromatography ( $\text{SiO}_2$ ) to give the corresponding product **S14** (PE/EA: 10:1).

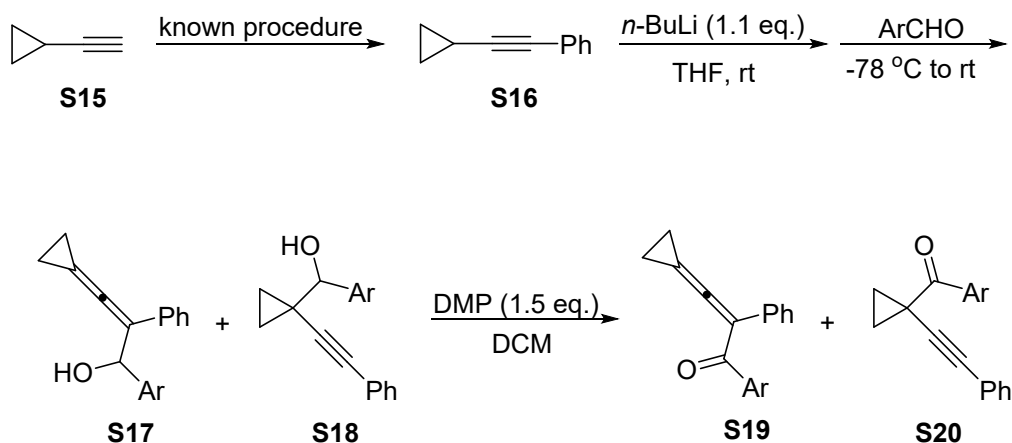

Typical procedure:

The procedure of preparing compounds **S16** were slightly modified by the previous literature.<sup>2,3,4</sup> To the solution of compounds **S16** (9.8 mmol, 1.0 eq.) in anhydrous THF (20 ml) was added  $n\text{-BuLi}$  (4.3 mL, 2.5 M in hexane, 1.1 eq.) at room temperature; the resulting mixture was stirred for 1.0 h, and cooled to  $-78\text{ }^{\circ}\text{C}$ . Then,  $\text{ArCHO}$  (9.8 mmol, 1.0 eq.) was added with a syringe to this mixture at  $-78\text{ }^{\circ}\text{C}$ . After being stirred for 1.0 h, the mixture was allowed to warm up to room temperature, and the reaction was quenched with water, and the resulting mixture was extracted with ethyl acetate, dried over anhydrous  $\text{MgSO}_4$ , filtered, and evaporated. The residue was chromatographed through a silica gel column (petroleum ether/ethyl acetate 4:1 v/v) to afford the mixture of **S17** and **S18** (2:1) as yellow oil.

To a solution of the mixture of **S17** and **S18** (1.0 eq.) in 30 mL of DCM were added 1.5 equiv of DMP and after being stirred for 10 min, silica gel was added and the solvent was evaporated. The solid residue was purified by a column chromatography (petroleum ether/ethyl acetate 50:1 v/v) on a silica gel column to give the starting material **S19**.

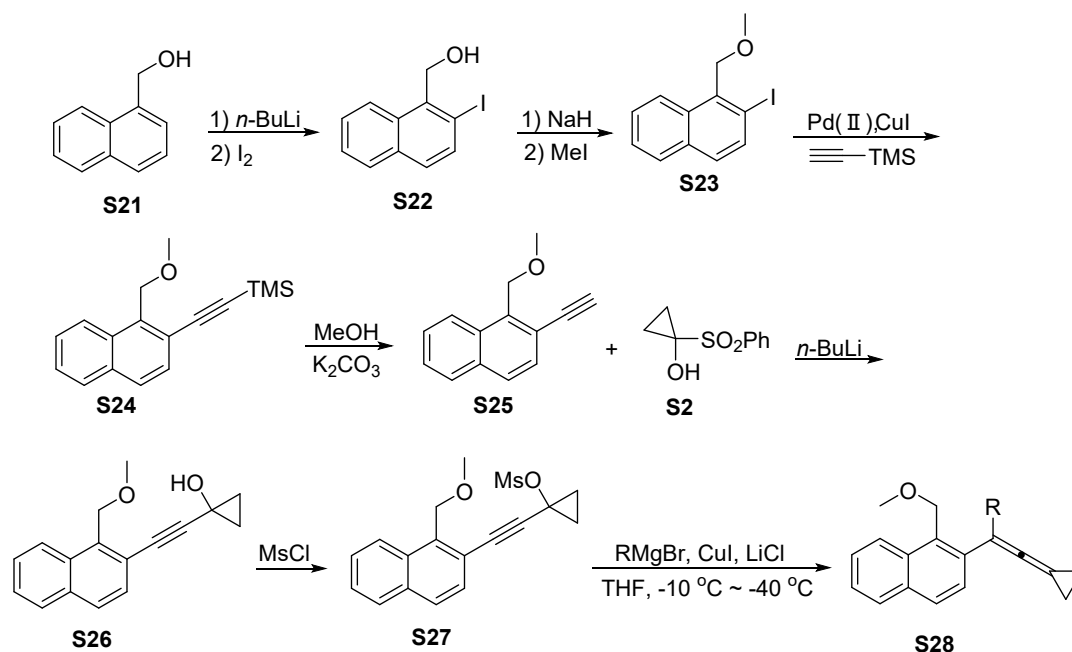

Typical procedure:

To a flame dried, argon purged 250 mL round-bottom flask was added  $Et_2O$  (10 mL), then *n*-BuLi (45.8 mL, 110 mmol, 2.4 M in hexane) and TMEDA (16.5 mL, 110 mmol) was added at  $-78\text{ }^\circ\text{C}$ . After stirring for 30 min, **S21** (7.9 g, 50 mmol) in 60 mL of  $Et_2O$  was added during 40 min via a syringe at room temperature. The resulting mixture was stirred for 4.0 h and  $I_2$  (15.2 g, 60 mmol) in 60 mL of diethyl ether was added quickly at  $0\text{ }^\circ\text{C}$ . Quenched by saturated aqueous  $Na_2S_2O_3$ , extracted by  $Et_2O$  three-times (50 mL each), the combined the organic phase was dried over anhydrous  $MgSO_4$ . After filtration, the solution was concentrated under reduced pressure and the residue was purified by a silica gel flash column chromatography with petroleum ether- $EtOAc$  as an eluent to give the corresponding products **S22**.

To a flame dried, argon purged round bottom flask was added **S22** (6.0 g, 21 mmol) dissolved in anhydrous THF (50 mL), and then NaH (1.0 g, 60 %, 25 mmol) was added in portions at  $0\text{ }^\circ\text{C}$ . After stirring for 1.0 h, MeI (1.56 mL, 25 mmol) was added slowly via a syringe. The reaction mixture was stirred at room temperature for 1.0 h. Quenched by water, extracted by  $Et_2O$  three-times (20 mL each), the combined the organic phase was dried over anhydrous  $MgSO_4$ . After filtration, the solution was concentrated under reduced pressure and the residue was purified by a silica gel flash column chromatography with petroleum ether- $EtOAc$  as an eluent to give the corresponding products **S23**.

**S23** (6.2 g, 21 mmol),  $Pd(PPh_3)_2Cl_2$  (147 mg, 0.21 mmol) and CuI (65 mg, 0.35 mmol) were added to a flame dried, three-necked flask. Then  $iPr_2NH$  (50 mL) was added to afford a yellow suspension.

Ethynyltrimethylsilane (3.3 mL, 23 mmol) was added dropwise via a syringe and the resulting mixture was stirred for another 30 min at room temperature. After filtration, the solution was concentrated under reduced pressure, which was directed used for the next reaction without further purification.

To a 250 mL round bottom flask was added **S24** in MeOH (50 mL), which was prepared by the previous step. Then K<sub>2</sub>CO<sub>3</sub> (5.5 g, 40 mmol) was added and the resulting mixture was stirred for 2.0 h at room temperature. After filtration, the solution was concentrated under reduced pressure and the residue was purified by a silica gel flash column chromatography with petroleum ether-EtOAc as an eluent to give the corresponding products **S25**.

To a flame dried, argon purged three-necked flask (marked as flask 1) was added **S25** (3.4 g, 17 mmol) dissolved in THF (50 mL). To another flame dried, argon purged three-necked flask (marked as flask 2) was added **S2** (3.76 g, 19 mmol) dissolved in THF (50 mL). The two flasks were set in a dry ice-acetone bath and cooled down to -78 °C. When the temperature reached, *n*-BuLi (7.9 mL, 2.4 M in hexane) was added dropwise to each of the flasks via syringes at the same temperature. The reaction mixtures were stirred at that temperature for 2.0 h. Then, the resulting mixture in flask 1 was transferred to flask 2 and the reaction vessel was removed from the bath and naturally warmed to room temperature. The reaction mixture was stirred at room temperature for 4.0 h. After that, the reaction was quenched with water (20 mL) and the resulting dark mixture was extracted with ethyl acetate (45 mL) for three times. The organic phase was concentrated under reduced pressure and the residue was purified by a silica gel flash column chromatography with petroleum ether-EtOAc as an eluent to give the corresponding products **S26**.

The steps for the synthesis of compound **S27** from compound **S26** are the same as the steps for the synthesis of compound **S5** from compound **S3** as that above mentioned procedure.



## 2 References

1. (a) W. Yuan, X. Tang, Y. Wei and M. Shi, *Chem. Eur. J.*, 2014, **20**, 3198-3204; (b) S. Yang, K.-H. Rui, X.-Y. Tang, Q. Xu and M. Shi, *J. Am. Chem. Soc.*, 2017, **139**, 5957-5964.
2. H. Siebeneicher, S. Doye, *Eur. J. Org. Chem.*, 2002, 1213.
3. C.-Y. Yang, M.-S. Lin, H.-H. Liao, R.-S. Liu, *Chem. Eur. J.*, 2010, **16**, 2696.
4. S. Ye, Z.-X. Yu, *Org. Lett.*, 2010, **12**, 804.
